# Supplementary material
Source: PubMed Central journal article supplement (PMC4235164)
Supplement: NIHMS640983-supplement-Online_Material.pdf [file NIHMS640983-supplement-Online_Material.pdf]

## Supplementary Online Content

Olds DL, Kitzman H, Knudtson MD, Anson E, Smith JA, Cole R. Effect of home visiting by nurses on maternal and child mortality: results of a 2-decade follow-up of a randomized clinical trial. *JAMA Pediatr*. Published online July 7, 2014. doi:10.1001/jamapediatrics.2014.472.

**eTable 1.** Services provided in each treatment condition

**eTable 2.** Background characteristics of all mothers randomized into each of 4 treatment conditions

**eTable 3.** Background characteristics of mothers whose children were born alive and matched with NDI data in treatments 2 and 4

**eReferences.**

This supplementary material has been provided by the authors to give readers additional information about their work.

**eTable 1. Services provided in each treatment condition**

| <b>Services</b>                     | <b>Treatment 1<br/>N=166</b> | <b>Treatment 2<br/>N=514</b> | <b>Treatment 3<br/>N=230</b> | <b>Treatment 4<br/>N=228</b> |
|-------------------------------------|------------------------------|------------------------------|------------------------------|------------------------------|
| Transportation for prenatal care    | X                            | X                            | X                            | X                            |
| Screening and referral for children |                              | X                            |                              | X                            |
| Prenatal/postpartum home visiting   |                              |                              | X                            | X                            |
| Infant and toddler home visiting    |                              |                              |                              | X                            |

Note: Treatments 1 and 3 were included to increase statistical power of the trial to detect program effects on pregnancy outcomes. Treatment 1 was added to the design to accommodate larger numbers of study participants than anticipated before all of the nurses had been hired to serve participants assigned to Treatments 3 and 4. Treatments 3 and 4 were combined to form a group visited during pregnancy and Treatments 1 and 2 were combined to form a prenatal control group used to estimate the effect of prenatal home visiting on pregnancy outcomes. Treatment 2 was contrasted with Treatment 4 to estimate the effect of prenatal, postpartum, and infant/toddler home visiting on maternal and child health measured after delivery in previous phases of follow-up.

**eTable 2. Background characteristics of all mothers randomized into each of 4 treatment conditions**

| Participant Background Characteristics                               | Treatment 1<br>(N=166) | Treatment 2<br>(N=514) | Treatment 3<br>(N=230) | Treatment 4<br>(N=228) |
|----------------------------------------------------------------------|------------------------|------------------------|------------------------|------------------------|
|                                                                      | %                      |                        |                        |                        |
| Married                                                              | 1.2%                   | 1.9%                   | 3.1%                   | 1.3%                   |
| Maternal Race, Non-Black                                             | 3.6%                   | 8.0%                   | 7.0%                   | 10.5%                  |
| Head of Household Employed                                           | 57.8%                  | 56.5%                  | 57.0%                  | 49.6%                  |
| Drank Alcohol Last 14 Days                                           | 3.6%                   | 3.9%                   | 4.0%                   | 4.8%                   |
| Smoked Cigarettes Last 3 Days                                        | 9.7%                   | 9.7%                   | 7.5%                   | 11.4%                  |
| Used Marijuana Last 14 Days                                          | 0.6%                   | 1.4%                   | 2.2%                   | 1.3%                   |
| Any Sexually Transmitted Disease, Pre-Randomization                  | 35.6%                  | 31.9%                  | 31.1%                  | 36.8%                  |
|                                                                      | Mean (SD)              |                        |                        |                        |
| Maternal Age                                                         | 18.02 (3.31)           | 18.10 (3.18)           | 17.92 (2.82)           | 18.14 (3.29)           |
| Gestational Age at Randomization, Weeks                              | 16.37 (6.05)           | 16.40 (5.77)           | 16.29 (5.55)           | 16.53 (5.57)           |
| Psychological Resources Index <sup>a, b</sup>                        | 100.62 (9.62)          | 100.09 (9.96)          | 100.01 (9.63)          | 99.33 (10.73)          |
| Highest Grade Completed - Mother                                     | 10.12 (2.03)           | 10.30 (1.86)           | 10.30 (2.02)           | 10.13 (2.02)           |
| Discretionary Annual Household Income (\$) <sup>c</sup>              | 1090 (677)             | 1666 (885)             | 2325 (341)             | 99 (611)               |
| % of Census Tract Below Poverty                                      | 39.17 (20.55)          | 34.53 (21.26)          | 36.15 (21.31)          | 35.77 (20.48)          |
| Housing Density <sup>d</sup>                                         | 0.94 (0.46)            | 0.94 (0.49)            | 0.97 (0.54)            | 1.02 (0.55)            |
| Conflict with Mother <sup>b, e</sup>                                 | 3.96 (0.81)            | 4.00 (0.90)            | 3.95 (0.71)            | 4.08 (0.90)            |
| Conflict with Partner <sup>b, e</sup>                                | 3.98 (0.78)            | 3.99 (0.85)            | 4.00 (0.79)            | 4.03 (0.79)            |
| Attitudes toward Childrearing Predictive of Child Abuse <sup>c</sup> | 99.60 (8.08)           | 99.75 (7.63)           | 100.13 (7.99)          | 100.73 (8.53)          |
| Household Poverty Index <sup>f</sup>                                 | 99.85 (9.30)           | 99.49 (10.03)          | 99.39 (10.24)          | 101.87 (10.01)         |

<sup>a</sup> Average z-scores of women's sense of mastery/self-efficacy,<sup>1,2</sup> mental health,<sup>3</sup> and intellectual functioning.<sup>4</sup>

<sup>b</sup> Standardized to sample mean = 100, SD = 10

<sup>c</sup> Household income derived from administrative records used to determine Medicaid eligibility based on income subsistence standards for Medicaid eligibility, reported household income, and number of individuals in household at registration..

<sup>d</sup> Persons per room

<sup>e</sup> Locally developed scale that assesses degree to which individual provides emotional and material support to mother.

<sup>f</sup> Average z-scores of household discretionary income, housing density, and whether head of household was employed.

**eTable3. Background characteristics of mothers whose children were born alive and matched with NDI data in Treatments 2 and 4**

| Participant Background Characteristics                               | Treatment 2<br>(N=489) | Treatment 4<br>(N=217) |
|----------------------------------------------------------------------|------------------------|------------------------|
|                                                                      | %                      |                        |
| Married                                                              | 1.8%                   | 1.4%                   |
| Maternal Race, Non-Black                                             | 8.2%                   | 10.6%                  |
| Head of Household Employed                                           | 56.1%                  | 50.5%                  |
| Drank Alcohol Last 14 Days                                           | 3.9%                   | 4.6%                   |
| Smoked Cigarettes Last 3 Days                                        | 9.6%                   | 11.1%                  |
| Use Marijuana Last 14 Days                                           | 1.4%                   | 0.9%                   |
| Any Drug Use (screen)                                                | 4.7%                   | 3.8%                   |
| Any Sexually Transmitted Disease, Pre-randomization                  | 32.9%                  | 37.8%                  |
|                                                                      | Mean (SD)              |                        |
| Maternal Age                                                         | 18.13 (3.20)           | 18.10 (3.25)           |
| Gestational Age at Randomization, Weeks                              | 16.54 (5.75)           | 16.66 (5.65)           |
| Psychological Resources Index <sup>a,b</sup>                         | 100.06 (10.05)         | 99.47 (10.77)          |
| Highest Grade Completed - Mother                                     | 10.32 (1.87)           | 10.12 (2.01)           |
| Discretionary Annual Household Income (\$) <sup>c</sup>              | 1673 (873)             | 96 (703)               |
| % Census Tract Below Poverty                                         | 34.40 (21.25)          | 35.15 (20.19)          |
| Housing Density <sup>d</sup>                                         | 0.94 (0.49)            | 1.03 (0.56)            |
| Conflict with Mother <sup>b,e</sup>                                  | 3.97 (0.87)            | 4.06 (0.83)            |
| Conflict with Partner <sup>b,e</sup>                                 | 3.99 (0.86)            | 4.04 (0.80)            |
| Attitudes toward Childrearing Predictive of Child Abuse <sup>c</sup> | 99.71 (7.68)           | 100.77 (8.58)          |
| Household Poverty Index <sup>f</sup>                                 | 99.50 (10.00)          | 101.83 (10.19)         |
| Neighborhood Disorganization Index <sup>g</sup>                      | 2.26 (1.63)            | 2.35 (1.78)            |

<sup>a</sup> Average z-scores of women's sense of mastery/self-efficacy,<sup>1,2</sup> mental health,<sup>3</sup> and intellectual functioning.<sup>4</sup>

<sup>b</sup> Standardized to sample mean = 100, SD = 10

<sup>c</sup> Household income derived from administrative records used to determine Medicaid eligibility based on income subsistence standards for Medicaid eligibility, reported household income, and number of individuals in household at registration..

<sup>d</sup> Persons per room

<sup>e</sup> Locally developed scale that assesses degree to which individual provides emotional and material support to mother.

<sup>f</sup> Average z-scores of household discretionary income, housing density, and whether head of household was employed.

<sup>g</sup> Average of variables calculated in standard deviation units from the national means of components that comprise index of concentrated social disadvantage (% of block group residents: a. < federal poverty level, b. receiving public assistance c. unemployed, d.headed by single women; e.< age 18; f) black).<sup>5</sup>

## eReferences

1. Pearlin LI, Schooler C. The structure of coping. *J Health Soc Behav.* 1967; 19:2-21.
2. Bandura A. Self-efficacy: toward a unifying theory of behavioral change. *Psychol Rev.* 1977; 84:191-215.
3. Ware JE, Veit CT, Donald CA. *Refinements in the Measurement of Mental Health for Adults in the Health Insurance Study.* Santa Monica, Calif: RAND Corp; 1985.
4. Shipley W. A self-administered scale for measuring intellectual impairment and deterioration. *J Psychol.* 1940; 9:371-377.
5. Sampson RJ, Raudenbush SW, Earls F. Neighborhoods and violent crime: a multilevel study of collective efficacy. *Science.* 1997; 277(5328):918-924.
